# Supplementary material for: Efficacy of Steroid-Impregnated Spacers After Endoscopic Sinus Surgery in Chronic Rhinosinusitis: A Systematic Review and Meta-Analysis
Source: PubMed Central journal article supplement — Clin Exp Otorhinolaryngol. 2023 Feb 15;16(2):148–58. doi: 10.21053/ceo.2022.01718 (PMC10208850; doi:10.21053/ceo.2022.01718), 2023-02-15
Supplement: ceo-2022-01718-Supplementary-References.pdf [file ceo-2022-01718-Supplementary-References.pdf]

**REFERENCES**

1. Cote DW, Wright ED. Triamcinolone-impregnated nasal dressing following endoscopic sinus surgery: a randomized, double-blind, placebo-controlled study. *Laryngoscope*. 2010 Jun;120(6):1269-73.
2. Murr AH, Smith TL, Hwang PH, Bhattacharyya N, Lanier BJ, Stambaugh JW, et al. Safety and efficacy of a novel bioabsorbable, steroid-eluting sinus stent. *Int Forum Allergy Rhinol*. 2011 Jan-Feb;1(1):23-32.
3. Rudmik L, Mace J, Mechor B. Effect of a dexamethasone Sinu-Foam™ middle meatal spacer on endoscopic sinus surgery outcomes: a randomized, double-blind, placebo-controlled trial. *Int Forum Allergy Rhinol*. 2012 May-Jun;2(3):248-51.
4. Marple BF, Smith TL, Han JK, Gould AR, Jampel HD, Stambaugh JW, et al. Advance II: a prospective, randomized study assessing safety and efficacy of bioabsorbable steroid-releasing sinus implants. *Otolaryngol Head Neck Surg*. 2012 Jun;146(6):1004-11.
5. Smith TL, Singh A, Luong A, Ow RA, Shotts SD, Sautter NB, et al. Randomized controlled trial of a bioabsorbable steroid-releasing implant in the frontal sinus opening. *Laryngoscope*. 2016 Dec;126(12):2659-64.
6. Adriaensen G, Lim KH, Fokkens WJ. Safety and efficacy of a bioabsorbable fluticasone propionate-eluting sinus dressing in postoperative management of endoscopic sinus surgery: a randomized clinical trial. *Int Forum Allergy Rhinol*. 2017 Aug;7(8):813-20.
7. Ha T, Valentine R, Moratti S, Hanton L, Robinson S, Wormald PJ. The efficacy of a novel budesonide chitosan gel on wound healing following endoscopic sinus surgery. *Int Forum Allergy Rhinol*. 2018 Mar;8(3):435-43.
8. Hwang CS, Al Sharhan SS, Kim BR, Kim SI, Kim JW, Cho HJ, et al. Randomized controlled trial of steroid-soaked absorbable calcium alginate nasal packing following endoscopic sinus surgery. *Laryngoscope*. 2018 Feb;128(2):311-6.
9. Luong A, Ow RA, Singh A, Weiss RL, Han JK, Gerencer R, et al. Safety and effectiveness of a bioabsorbable steroid-releasing implant for the paranasal sinus ostia: a randomized clinical trial. *JAMA Otolaryngol Head Neck Surg*. 2018 Jan;144(1):28-35.
10. Zhao KQ, Yu YQ, Yu HM. Effects of mometasone furoate-impregnated biodegradable nasal dressing on endoscopic appearance in healing process following endoscopic sinus surgery: a randomized, double-blind, placebo-controlled study. *Int Forum Allergy Rhinol*. 2018 Nov;8(11):1233-41.
11. Grzeskowiak B, Wierzchowska M, Walorek R, Serejka-Burduk M, Wawrzyniak K, Burduk PK. Steroid vs. antibiotic impregnated absorbable nasal packing for wound healing after endoscopic sinus surgery: a randomized, double blind, placebo-controlled study. *Braz J Otorhinolaryngol*. 2019 Jul-Aug;85(4):473-80.
12. Gyawali BR, Pradhan B, Thapa N. Comparison of outcomes of triamcinolone versus normal saline soaked polyvinyl alcohol pack following bilateral endoscopic sinus surgery. *Rhinology*. 2019 Aug;57(4):287-92.
13. Samarei R, Rasouli J, Mehdikhani F. Efficacy of triamcinolone acetamide-impregnated Gelfoam nasal pack in management of chronic sinusitis with nasal polyps following endoscopic sinus surgery: a perfectly matched, placebo-controlled trial study. *Eur Arch Otorhinolaryngol*. 2022 Jun;279(6):2915-24.
14. Huang Z, Zhou B, Wang D, Zang H, Zhang H, Wang H, et al. Comparison of bioabsorbable steroid-eluting sinus stents versus nasopore after endoscopic sinus surgery: a multicenter, randomized, controlled, single-blinded clinical trial. *Ear Nose Throat J*. 2022 May;101(4):260-7.
15. More Y, Willen S, Catalano P. Management of early nasal polyposis using a steroid-impregnated nasal dressing. *Int Forum Allergy Rhinol*. 2011 Sep-Oct;1(5):401-4.
16. Xu J, Park SJ, Park HS, Han R, Rha KS, Kim YM. Effects of triamcinolone-impregnated nasal dressing on subjective and objective outcomes following endoscopic sinus surgery. *Eur Arch Otorhinolaryngol*. 2016 Dec;273(12):4351-7.
