# Supplementary material for: Efficacy of Steroid-Impregnated Spacers After Endoscopic Sinus Surgery in Chronic Rhinosinusitis: A Systematic Review and Meta-Analysis
Source: PubMed Central journal article supplement — Clin Exp Otorhinolaryngol. 2023 Feb 15;16(2):148–58. doi: 10.21053/ceo.2022.01718 (PMC10208850; doi:10.21053/ceo.2022.01718), 2023-02-15
Supplement: ceo-2022-01718-Supplementary-Table-1.pdf [file ceo-2022-01718-Supplementary-Table-1.pdf]

## Clinical and Experimental Otorhinolaryngology

Supplementary Table 1. Literature database search terms and queries

| Database | Search | Search terms/queries                                                                                                                                                                                                                                                                                                                                                                                                                                                                  |
|----------|--------|---------------------------------------------------------------------------------------------------------------------------------------------------------------------------------------------------------------------------------------------------------------------------------------------------------------------------------------------------------------------------------------------------------------------------------------------------------------------------------------|
| PubMed   | #1     | "Chronic Disease"[Mesh]                                                                                                                                                                                                                                                                                                                                                                                                                                                               |
|          | #2     | "Chronic Disease"[TW] OR "Chronic Diseases"[TW] OR "Disease, Chronic"[TW] OR "Chronic Illness"[TW] OR "Chronic Illnesses"[TW] OR "Illness, Chronic"[TW] OR "Chronic Condition"[TW] OR "Chronic Conditions"[TW] OR "Condition, Chronic"[TW] OR "Chronically Ill"[TW] OR "Chronic"[TW] OR "chronic rhinosinusitis"[TW] OR "chronic sinusitis"[TW]                                                                                                                                       |
|          | #3     | #1 OR #2                                                                                                                                                                                                                                                                                                                                                                                                                                                                              |
|          | #4     | "Sinusitis"[Mesh]                                                                                                                                                                                                                                                                                                                                                                                                                                                                     |
|          | #5     | "Sinusitis"[TW] OR "Sinusitides"[TW] OR "Sinus Infections"[TW] OR "Infection, Sinus"[TW] OR "Infections, Sinus"[TW] OR "Sinus Infection"[TW] OR "rhinosinusitis "[TW] OR "chronic rhinosinusitis"[TW] OR "chronic sinusitis"[TW]                                                                                                                                                                                                                                                      |
|          | #6     | "Rhinitis"[Mesh]                                                                                                                                                                                                                                                                                                                                                                                                                                                                      |
|          | #7     | "Rhinitis"[TW] OR "Rhinitides"[TW] OR "Nasal Catarrh"[TW] OR "Catarrh, Nasal"[TW] OR "Catarrhs, Nasal"[TW] OR "Nasal Catarrhs"[TW]                                                                                                                                                                                                                                                                                                                                                    |
|          | #8     | "Paranasal Sinuses"[Mesh]                                                                                                                                                                                                                                                                                                                                                                                                                                                             |
|          | #9     | "Paranasal Sinuses"[TW] OR "Sinuses, Paranasal"[TW] OR "Nasal Sinuses"[TW] OR "Sinuses, Nasal"[TW] OR "Sinonasal Tract"[TW] OR "Sinonasal Tracts"[TW] OR "Tract, Sinonasal"[TW] OR "paranasal sinusitis"[TW]                                                                                                                                                                                                                                                                          |
|          | #10    | #4 OR #5 OR #6 OR #7 OR #8 OR #9                                                                                                                                                                                                                                                                                                                                                                                                                                                      |
|          | #11    | "Endoscopy"[Mesh]                                                                                                                                                                                                                                                                                                                                                                                                                                                                     |
|          | #12    | "Endoscopy"[TW] OR "Surgical Procedures, Endoscopic"[TW] OR "Procedure, Endoscopic Surgical"[TW] OR "Procedures, Endoscopic Surgical"[TW] OR "Surgical Procedure, Endoscopic"[TW] OR "Endoscopy, Surgical"[TW] OR "Surgical Endoscopy"[TW] OR "Endoscopic Surgical Procedure"[TW] OR "Endoscopic Surgical Procedures"[TW] OR "endoscopic "[TW] OR "endoscopic sinus surgery"[TW] OR "functional endoscopic sinus surgery"[TW] OR "FESS"[TW] OR "ESS"[TW] OR "sinus surgery"[TW]       |
|          | #13    | "Nasal Surgical Procedures"[Mesh]                                                                                                                                                                                                                                                                                                                                                                                                                                                     |
|          | #14    | "Nasal Surgical Procedures"[TW] OR "Nasal Surgical Procedure"[TW] OR "Procedure, Nasal Surgical"[TW] OR "Procedures, Nasal Surgical"[TW] OR "Surgical Procedure, Nasal"[TW] OR "Surgical Procedures, Nasal"[TW] OR "Rhinosurgery"[TW] OR "Rhinosurgeries"[TW] OR "Nasal Surgery"[TW] OR "Nasal Surgeries"[TW] OR "Surgeries, Nasal"[TW] OR "Surgery, Nasal"[TW] OR "Intranasal Surgery"[TW] OR "Intranasal Surgeries"[TW] OR "Surgeries, Intranasal"[TW] OR "Surgery, Intranasal"[TW] |
|          | #15    | #11 OR #12 OR #13 OR #14                                                                                                                                                                                                                                                                                                                                                                                                                                                              |
|          | #16    | #3 AND #10 AND #15                                                                                                                                                                                                                                                                                                                                                                                                                                                                    |
|          | #17    | "steroid-impregnated spacers"[TW] OR "steroid-impregnated spacer"[TW] OR "steroid-impregnated packing"[TW] OR "spacer"[TW] OR "nasal packing"[TW]                                                                                                                                                                                                                                                                                                                                     |
|          | #18    | "Steroids"[Mesh]                                                                                                                                                                                                                                                                                                                                                                                                                                                                      |
|          | #19    | "Steroids"[TW] OR "Steroid"[TW] OR "Catatoxic Steroids"[TW] OR "Steroids, Catatoxic"[TW] OR "steroid-eluting"[TW]                                                                                                                                                                                                                                                                                                                                                                     |
|          | #20    | "Stents"[Mesh] OR "Stents"[TW] OR "Stent"[TW]                                                                                                                                                                                                                                                                                                                                                                                                                                         |
|          | #21    | "Drug Implants"[Mesh]                                                                                                                                                                                                                                                                                                                                                                                                                                                                 |
|          | #22    | "Drug Implants"[TW] OR "Implants, Drug"[TW] OR "Drug Implant"[TW] OR "Implant, Drug"[TW] OR "Pellets, Drug"[TW] OR "Drug Pellets"[TW] OR "Drug Pellet"[TW] OR "Pellet, Drug"[TW] OR "implant"[TW]                                                                                                                                                                                                                                                                                     |
|          | #23    | #17 OR #18 OR #19 OR #20 OR #21 OR #22                                                                                                                                                                                                                                                                                                                                                                                                                                                |
|          | #24    | #16 AND #23                                                                                                                                                                                                                                                                                                                                                                                                                                                                           |
|          | #25    | #24 NOT ("animals"[MeSH] NOT "Humans"[MeSH])                                                                                                                                                                                                                                                                                                                                                                                                                                          |
| Embase   | #1     | "chronic disease"/exp                                                                                                                                                                                                                                                                                                                                                                                                                                                                 |
|          | #2     | "Chronic Disease":ti,ab,kw,de OR "Chronic Diseases":ti,ab,kw,de OR "Disease, Chronic":ti,ab,kw,de OR "Chronic Illness":ti,ab,kw,de OR "Chronic Illnesses":ti,ab,kw,de OR "Illness, Chronic":ti,ab,kw,de OR "Chronic Condition":ti,ab,kw,de OR "Chronic Conditions":ti,ab,kw,de OR "Condition, Chronic":ti,ab,kw,de OR "Chronically Ill":ti,ab,kw,de OR "Chronic":ti,ab,kw,de OR "chronic rhinosinusitis":ti,ab,kw,de OR "chronic sinusitis":ti,ab,kw,de                               |
|          | #3     | #1 OR #2                                                                                                                                                                                                                                                                                                                                                                                                                                                                              |
|          | #4     | "sinusitis"/exp                                                                                                                                                                                                                                                                                                                                                                                                                                                                       |
|          | #5     | "Sinusitis":ti,ab,kw,de OR "Sinusitides":ti,ab,kw,de OR "Sinus Infections":ti,ab,kw,de OR "Infection, Sinus":ti,ab,kw,de OR "Infections, Sinus":ti,ab,kw,de OR "Sinus Infection":ti,ab,kw,de OR "rhinosinusitis ":ti,ab,kw,de OR "chronic rhinosinusitis":ti,ab,kw,de OR "chronic sinusitis":ti,ab,kw,de                                                                                                                                                                              |
|          | #6     | "rhinitis"/exp                                                                                                                                                                                                                                                                                                                                                                                                                                                                        |
|          | #7     | "Rhinitis":ti,ab,kw,de OR "Rhinitides":ti,ab,kw,de OR "Nasal Catarrh":ti,ab,kw,de OR "Catarrh, Nasal":ti,ab,kw,de OR "Catarrhs, Nasal":ti,ab,kw,de OR "Nasal Catarrhs":ti,ab,kw,de                                                                                                                                                                                                                                                                                                    |
|          | #8     | "paranasal sinus"/exp                                                                                                                                                                                                                                                                                                                                                                                                                                                                 |

(Continued to the next page)

Supplementary Table 1. Continued

| Database         | Search | Search terms/queries                                                                                                                                                                                                                                                                                                                                                                                                                                                                                                                                                                                                  |
|------------------|--------|-----------------------------------------------------------------------------------------------------------------------------------------------------------------------------------------------------------------------------------------------------------------------------------------------------------------------------------------------------------------------------------------------------------------------------------------------------------------------------------------------------------------------------------------------------------------------------------------------------------------------|
|                  | #9     | "Paranasal Sinuses".ti,ab,kw,de OR "Sinuses, Paranasal".ti,ab,kw,de OR "Nasal Sinuses".ti,ab,kw,de OR "Sinuses, Nasal".ti,ab,kw,de OR "Sinonasal Tract".ti,ab,kw,de OR "Sinonasal Tracts".ti,ab,kw,de OR "Tract, Sinonasal".ti,ab,kw,de OR "paranasal sinusitis".ti,ab,kw,de                                                                                                                                                                                                                                                                                                                                          |
|                  | #10    | #4 OR #5 OR #6 OR #7 OR #8 OR #9                                                                                                                                                                                                                                                                                                                                                                                                                                                                                                                                                                                      |
|                  | #11    | "endoscopy"/exp                                                                                                                                                                                                                                                                                                                                                                                                                                                                                                                                                                                                       |
|                  | #12    | "Endoscopy".ti,ab,kw,de OR "Surgical Procedures, Endoscopic".ti,ab,kw,de OR "Procedure, Endoscopic Surgical".ti,ab,kw,de OR "Procedures, Endoscopic Surgical".ti,ab,kw,de OR "Surgical Procedure, Endoscopic".ti,ab,kw,de OR "Endoscopy, Surgical".ti,ab,kw,de OR "Surgical Endoscopy".ti,ab,kw,de OR "Endoscopic Surgical Procedure".ti,ab,kw,de OR "Endoscopic Surgical Procedures".ti,ab,kw,de OR "endoscopic ".ti,ab,kw,de OR "endoscopic sinus surgery".ti,ab,kw,de OR "functional endoscopic sinus surgery".ti,ab,kw,de OR "FESS".ti,ab,kw,de OR "ESS".ti,ab,kw,de OR "sinus surgery".ti,ab,kw,de               |
|                  | #13    | "nose surgery"/exp                                                                                                                                                                                                                                                                                                                                                                                                                                                                                                                                                                                                    |
|                  | #14    | "Nasal Surgical Procedures".ti,ab,kw,de OR "Nasal Surgical Procedure".ti,ab,kw,de OR "Procedure, Nasal Surgical".ti,ab,kw,de OR "Procedures, Nasal Surgical".ti,ab,kw,de OR "Surgical Procedure, Nasal".ti,ab,kw,de OR "Surgical Procedures, Nasal".ti,ab,kw,de OR "Rhinosurgery".ti,ab,kw,de OR "Rhinosurgeries".ti,ab,kw,de OR "Nasal Surgery".ti,ab,kw,de OR "Nasal Surgeries".ti,ab,kw,de OR "Surgeries, Nasal".ti,ab,kw,de OR "Surgery, Nasal".ti,ab,kw,de OR "Intranasal Surgery".ti,ab,kw,de OR "Intranasal Surgeries".ti,ab,kw,de OR "Surgeries, Intranasal".ti,ab,kw,de OR "Surgery, Intranasal".ti,ab,kw,de |
|                  | #15    | #11 OR #12 OR #13 OR #14                                                                                                                                                                                                                                                                                                                                                                                                                                                                                                                                                                                              |
|                  | #16    | #3 AND #10 AND #15                                                                                                                                                                                                                                                                                                                                                                                                                                                                                                                                                                                                    |
|                  | #17    | "steroid-impregnated spacers".ti,ab,kw,de OR "steroid-impregnated spacer".ti,ab,kw,de OR "steroid-impregnated packing".ti,ab,kw,de OR "spacer".ti,ab,kw,de OR "nasal packing".ti,ab,kw,de                                                                                                                                                                                                                                                                                                                                                                                                                             |
|                  | #18    | "steroid"/exp                                                                                                                                                                                                                                                                                                                                                                                                                                                                                                                                                                                                         |
|                  | #19    | "Steroids".ti,ab,kw,de OR "Steroid".ti,ab,kw,de OR "Catatoxic Steroids".ti,ab,kw,de OR "Steroids, Catatoxic".ti,ab,kw,de OR "steroid-eluting".ti,ab,kw,de                                                                                                                                                                                                                                                                                                                                                                                                                                                             |
|                  | #20    | "stent"/exp OR "Stents".ti,ab,kw,de OR "Stent".ti,ab,kw,de                                                                                                                                                                                                                                                                                                                                                                                                                                                                                                                                                            |
|                  | #21    | "drug implant"/exp                                                                                                                                                                                                                                                                                                                                                                                                                                                                                                                                                                                                    |
|                  | #22    | "Drug Implants".ti,ab,kw,de OR "Implants, Drug".ti,ab,kw,de OR "Drug Implant".ti,ab,kw,de OR "Implant, Drug".ti,ab,kw,de OR "Pellets, Drug".ti,ab,kw,de OR "Drug Pellets".ti,ab,kw,de OR "Drug Pellet".ti,ab,kw,de OR "Pellet, Drug".ti,ab,kw,de OR "implant".ti,ab,kw,de                                                                                                                                                                                                                                                                                                                                             |
|                  | #23    | #17 OR #18 OR #19 OR #20 OR #21 OR #22                                                                                                                                                                                                                                                                                                                                                                                                                                                                                                                                                                                |
|                  | #24    | #16 AND #23                                                                                                                                                                                                                                                                                                                                                                                                                                                                                                                                                                                                           |
|                  | #25    | #24 NOT ('animal'/exp NOT 'human'/exp)                                                                                                                                                                                                                                                                                                                                                                                                                                                                                                                                                                                |
| Cochrane Library | #1     | [mh "Chronic Disease"]                                                                                                                                                                                                                                                                                                                                                                                                                                                                                                                                                                                                |
|                  | #2     | "Chronic Disease".ti,ab,kw OR "Chronic Diseases".ti,ab,kw OR "Disease, Chronic".ti,ab,kw OR "Chronic Illness".ti,ab,kw OR "Chronic Illnesses".ti,ab,kw OR "Illness, Chronic".ti,ab,kw OR "Chronic Condition".ti,ab,kw OR "Chronic Conditions".ti,ab,kw OR "Condition, Chronic".ti,ab,kw OR "Chronically Ill".ti,ab,kw OR "Chronic".ti,ab,kw OR "chronic rhinosinusitis".ti,ab,kw OR "chronic sinusitis".ti,ab,kw                                                                                                                                                                                                      |
|                  | #3     | #1 OR #2                                                                                                                                                                                                                                                                                                                                                                                                                                                                                                                                                                                                              |
|                  | #4     | [mh "Sinusitis"]                                                                                                                                                                                                                                                                                                                                                                                                                                                                                                                                                                                                      |
|                  | #5     | "Sinusitis".ti,ab,kw OR "Sinusitides".ti,ab,kw OR "Sinus Infections".ti,ab,kw OR "Infection, Sinus".ti,ab,kw OR "Infections, Sinus".ti,ab,kw OR "Sinus Infection".ti,ab,kw OR "rhinosinusitis".ti,ab,kw OR "chronic rhinosinusitis".ti,ab,kw OR "chronic sinusitis".ti,ab,kw                                                                                                                                                                                                                                                                                                                                          |
|                  | #6     | [mh "Rhinitis"]                                                                                                                                                                                                                                                                                                                                                                                                                                                                                                                                                                                                       |
|                  | #7     | "Rhinitis".ti,ab,kw OR "Rhinitides".ti,ab,kw OR "Nasal Catarrh".ti,ab,kw OR "Catarrh, Nasal".ti,ab,kw OR "Catarrhs, Nasal".ti,ab,kw OR "Nasal Catarrhs".ti,ab,kw                                                                                                                                                                                                                                                                                                                                                                                                                                                      |
|                  | #8     | [mh "Paranasal Sinuses"]                                                                                                                                                                                                                                                                                                                                                                                                                                                                                                                                                                                              |
|                  | #9     | "Paranasal Sinuses".ti,ab,kw OR "Sinuses, Paranasal".ti,ab,kw OR "Nasal Sinuses".ti,ab,kw OR "Sinuses, Nasal".ti,ab,kw OR "Sinonasal Tract".ti,ab,kw OR "Sinonasal Tracts".ti,ab,kw OR "Tract, Sinonasal".ti,ab,kw OR "paranasal sinusitis".ti,ab,kw                                                                                                                                                                                                                                                                                                                                                                  |
|                  | #10    | {OR #4-#9}                                                                                                                                                                                                                                                                                                                                                                                                                                                                                                                                                                                                            |
|                  | #11    | [mh "Endoscopy"]                                                                                                                                                                                                                                                                                                                                                                                                                                                                                                                                                                                                      |
|                  | #12    | "Endoscopy".ti,ab,kw OR "Surgical Procedures, Endoscopic".ti,ab,kw OR "Procedure, Endoscopic Surgical".ti,ab,kw OR "Procedures, Endoscopic Surgical".ti,ab,kw OR "Surgical Procedure, Endoscopic".ti,ab,kw OR "Endoscopy, Surgical".ti,ab,kw OR "Surgical Endoscopy".ti,ab,kw OR "Endoscopic Surgical Procedure".ti,ab,kw OR "Endoscopic Surgical Procedures".ti,ab,kw OR "endoscopic ".ti,ab,kw OR "endoscopic sinus surgery".ti,ab,kw OR "functional endoscopic sinus surgery".ti,ab,kw OR "FESS".ti,ab,kw OR "ESS".ti,ab,kw OR "sinus surgery".ti,ab,kw                                                            |

(Continued to the next page)

## Clinical and Experimental Otorhinolaryngology

Supplementary Table 1. Continued

| Database       | Search  | Search terms/queries                                                                                                                                                                                                                                                                                                                                                                                                                                                                                                                                                  |
|----------------|---------|-----------------------------------------------------------------------------------------------------------------------------------------------------------------------------------------------------------------------------------------------------------------------------------------------------------------------------------------------------------------------------------------------------------------------------------------------------------------------------------------------------------------------------------------------------------------------|
|                | #13     | [mh "Nasal Surgical Procedures"]                                                                                                                                                                                                                                                                                                                                                                                                                                                                                                                                      |
|                | #14     | "Nasal Surgical Procedures":ti,ab,kw OR "Nasal Surgical Procedure":ti,ab,kw OR "Procedure, Nasal Surgical":ti,ab,kw OR "Procedures, Nasal Surgical":ti,ab,kw OR "Surgical Procedure, Nasal":ti,ab,kw OR "Surgical Procedures, Nasal":ti,ab,kw OR "Rhinosurgery":ti,ab,kw OR "Rhinosurgeries":ti,ab,kw OR "Nasal Surgery":ti,ab,kw OR "Nasal Surgeries":ti,ab,kw OR "Surgeries, Nasal":ti,ab,kw OR "Surgery, Nasal":ti,ab,kw OR "Intranasal Surgery":ti,ab,kw OR "Intranasal Surgeries":ti,ab,kw OR "Surgeries, Intranasal":ti,ab,kw OR "Surgery, Intranasal":ti,ab,kw |
|                | #15     | {OR #11-#14}                                                                                                                                                                                                                                                                                                                                                                                                                                                                                                                                                          |
|                | #16     | #3 AND #10 AND #15                                                                                                                                                                                                                                                                                                                                                                                                                                                                                                                                                    |
|                | #17     | "steroid-impregnated spacers":ti,ab,kw OR "steroid-impregnated spacer":ti,ab,kw OR "steroid-impregnated packing":ti,ab,kw OR "spacer":ti,ab,kw OR "nasal packing":ti,ab,kw                                                                                                                                                                                                                                                                                                                                                                                            |
|                | #18     | [mh "Steroids"]                                                                                                                                                                                                                                                                                                                                                                                                                                                                                                                                                       |
|                | #19     | "Steroids":ti,ab,kw OR "Steroid":ti,ab,kw OR "Catatoxic Steroids":ti,ab,kw OR "Steroids, Catatoxic":ti,ab,kw OR "steroid-eluting":ti,ab,kw                                                                                                                                                                                                                                                                                                                                                                                                                            |
|                | #20     | [mh "Stents"] OR "Stents":ti,ab,kw OR "Stent":ti,ab,kw                                                                                                                                                                                                                                                                                                                                                                                                                                                                                                                |
|                | #21     | [mh "Drug Implants"]                                                                                                                                                                                                                                                                                                                                                                                                                                                                                                                                                  |
|                | #22     | "Drug Implants":ti,ab,kw OR "Implants, Drug":ti,ab,kw OR "Drug Implant":ti,ab,kw OR "Implant, Drug":ti,ab,kw OR "Pellets, Drug":ti,ab,kw OR "Drug Pellets":ti,ab,kw OR "Drug Pellet":ti,ab,kw OR "Pellet, Drug":ti,ab,kw OR "implant":ti,ab,kw                                                                                                                                                                                                                                                                                                                        |
|                | #23     | {OR #17-#22}                                                                                                                                                                                                                                                                                                                                                                                                                                                                                                                                                          |
|                | #24     | #16 AND #23                                                                                                                                                                                                                                                                                                                                                                                                                                                                                                                                                           |
|                | #25     | #24 NOT ([mh "animals"]) NOT ([mh "Humans"])                                                                                                                                                                                                                                                                                                                                                                                                                                                                                                                          |
| Web of Science | #1      | TS=("Chronic Disease" OR "Chronic" OR "chronic rhinosinusitis" OR "chronic sinusitis")                                                                                                                                                                                                                                                                                                                                                                                                                                                                                |
|                | #2      | TS=("Sinusitis" OR "Sinusitides" OR "Sinus Infections" OR "Sinus Infection" OR "rhinosinusitis" OR "chronic rhinosinusitis" OR "chronic sinusitis")                                                                                                                                                                                                                                                                                                                                                                                                                   |
|                | #3      | TS=("Endoscopy" OR "Surgical Endoscopy" OR "Endoscopic Surgical Procedure" OR "endoscopic" OR "endoscopic sinus surgery" OR "functional endoscopic sinus surgery" OR "FESS" OR "ESS" OR "sinus surgery")                                                                                                                                                                                                                                                                                                                                                              |
|                | #4      | #1 AND #2 AND #3                                                                                                                                                                                                                                                                                                                                                                                                                                                                                                                                                      |
|                | #5      | TS=("Steroids" OR "Steroid" OR "steroid-eluting" OR "steroid-impregnated spacer" OR "steroid-impregnated packing" OR "spacer" OR "nasal packing" OR "Stents" OR "Stent" OR "Drug Implants" OR "Drug Implant" OR "implant")                                                                                                                                                                                                                                                                                                                                            |
|                | #6      | #4 AND #5                                                                                                                                                                                                                                                                                                                                                                                                                                                                                                                                                             |
|                | Combine |                                                                                                                                                                                                                                                                                                                                                                                                                                                                                                                                                                       |
| Google Scholar | #1      | ("Chronic") AND ("Sinusitis" OR "Sinusitides" OR "Sinus" OR "rhinosinusitis") AND ("Endoscopy" OR "endoscopic" OR "FESS" OR "ESS")                                                                                                                                                                                                                                                                                                                                                                                                                                    |
|                | #2      | ("Steroid" OR "spacer" OR "nasal packing" OR "Stent" OR "implant")                                                                                                                                                                                                                                                                                                                                                                                                                                                                                                    |
|                | #3      | ((("Chronic") AND ("Sinusitis" OR "Sinusitides" OR "Sinus" OR "rhinosinusitis" )) AND ("Endoscopy" OR "endoscopic" OR "FESS" OR "ESS")) AND ("Steroid" OR "spacer" OR "nasal packing" OR "Stent" OR "implant")                                                                                                                                                                                                                                                                                                                                                        |
|                | Combine |                                                                                                                                                                                                                                                                                                                                                                                                                                                                                                                                                                       |
