# Supplementary material for: Efficacy of Steroid-Impregnated Spacers After Endoscopic Sinus Surgery in Chronic Rhinosinusitis: A Systematic Review and Meta-Analysis
Source: PubMed Central journal article supplement — Clin Exp Otorhinolaryngol. 2023 Feb 15;16(2):148–58. doi: 10.21053/ceo.2022.01718 (PMC10208850; doi:10.21053/ceo.2022.01718), 2023-02-15
Supplement: ceo-2022-01718-Supplementary-Table-2.pdf [file ceo-2022-01718-Supplementary-Table-2.pdf]

Supplementary Table 2. Results of quality assessment of randomized controlled studies using the Cochrane risk of bias tool

| Study                          | Random sequence generation | Allocation concealment | Blinding of participants and personnel | Blinding of outcome assessment | Incomplete outcome data addressed | Free of selective reporting | Risk of Bias of randomized studies |
|--------------------------------|----------------------------|------------------------|----------------------------------------|--------------------------------|-----------------------------------|-----------------------------|------------------------------------|
| Cote et al. (2010) [1]         | Yes                        | Yes                    | Yes                                    | Yes                            | Yes                               | Yes                         | Low risk                           |
| Murr et al. (2011) [2]         | Yes                        | Yes                    | Yes                                    | Yes                            | Yes                               | Yes                         | Low risk                           |
| Rudmik et al. (2012) [3]       | Yes                        | Yes                    | Yes                                    | Yes                            | Yes                               | Yes                         | Low risk                           |
| Marple et al. (2012) [4]       | Yes                        | Yes                    | Yes                                    | Yes                            | Yes                               | Yes                         | Low risk                           |
| Smith et al. (2016) [5]        | Yes                        | Yes                    | Yes                                    | Yes                            | Yes                               | Yes                         | Low risk                           |
| Adriaensen et al. (2017) [6]   | Yes                        | No                     | Unclear                                | Unclear                        | No                                | Yes                         | Unclear risk                       |
| Ha et al. (2018) [7]           | Yes                        | Yes                    | Yes                                    | Yes                            | Yes                               | Yes                         | Low risk                           |
| Hwang et al. (2018) [8]        | Yes                        | Yes                    | Unclear                                | Unclear                        | Yes                               | Yes                         | Unclear risk                       |
| Luong et al. (2018) [9]        | Yes                        | Yes                    | Yes                                    | Yes                            | Yes                               | Yes                         | Low risk                           |
| Zhao et al. (2018) [10]        | Yes                        | Yes                    | Yes                                    | Yes                            | Yes                               | Yes                         | Low risk                           |
| Grzeskowiak et al. (2019) [11] | Yes                        | Yes                    | Yes                                    | Yes                            | Yes                               | Yes                         | Low risk                           |
| Gyawali et al. (2019) [12]     | Yes                        | No                     | No                                     | No                             | Yes                               | Unclear                     | High risk                          |
| Samarei et al. (2022) [13]     | Yes                        | Yes                    | Yes                                    | Yes                            | Yes                               | Yes                         | Low risk                           |
| Huang et al. (2022) [14]       | Yes                        | Yes                    | No                                     | Yes                            | Yes                               | Yes                         | High risk                          |
