# Supplementary material for: Efficacy of Steroid-Impregnated Spacers After Endoscopic Sinus Surgery in Chronic Rhinosinusitis: A Systematic Review and Meta-Analysis
Source: PubMed Central journal article supplement — Clin Exp Otorhinolaryngol. 2023 Feb 15;16(2):148–58. doi: 10.21053/ceo.2022.01718 (PMC10208850; doi:10.21053/ceo.2022.01718), 2023-02-15
Supplement: ceo-2022-01718-Supplementary-Table-4.pdf [file ceo-2022-01718-Supplementary-Table-4.pdf]

**Supplementary Table 4.** Results of a subgroup analysis comparing the incidence of postoperative outcomes between the absorbable nasal dressing and drug-eluting sinus stent groups

|                           | Adhesion or synechia (2–3 wk)                | Polypoid change (2–3 wk)                     | Polypoid change (2–3 mo)                     |
|---------------------------|----------------------------------------------|----------------------------------------------|----------------------------------------------|
| All                       | (n=6)                                        | (n=9)                                        | (n=5)                                        |
|                           | 0.3179 (0.1911–0.5290), I <sup>2</sup> =0.0% | 0.3263 (0.2415–0.4408), I <sup>2</sup> =0.0% | 0.3021 (0.1697–0.5378), I <sup>2</sup> =0.0% |
| Absorbable nasal dressing | (n=2)                                        | (n=3)                                        | (n=2)                                        |
|                           | 0.3699 (0.1765–0.7755), I <sup>2</sup> =0.0% | 0.3807 (0.1568–0.9241), I <sup>2</sup> =0.0% | 0.4399 (0.1386–1.3959), I <sup>2</sup> =1.6% |
| Drug-eluting sinus stent  | (n=4)                                        | (n=6)                                        | (n=3)                                        |
|                           | 0.2775 (0.1376–0.5596), I <sup>2</sup> =0.0% | 0.3198 (0.2323–0.4404), I <sup>2</sup> =0.0% | 0.2667 (0.1370–0.5188), I <sup>2</sup> =0.0% |
| <i>P</i> -value           | 0.5807                                       | 0.7174                                       | 0.4618                                       |

Values are presented as odds ratio (95% confidence interval).
